# Supplementary material
Source: PubMed Central journal article supplement (PMC3638991)
Supplement: NIHMS455792-supplement-Supplementary_File.pdf [file NIHMS455792-supplement-Supplementary_File.pdf]

**Supplement Table 1.** Spatial methods by substantive topics.

|                                                                                                      |                         | Proximity | Aggregation | Clustering | Interpolation | Smoothing | Spatial Regression |
|------------------------------------------------------------------------------------------------------|-------------------------|-----------|-------------|------------|---------------|-----------|--------------------|
|                                                                                                      | <i>Marginal Total</i> * | 65        | 44          | 36         | 14            | 12        | 47                 |
| Disparities (race/ethnic or socio-economic disparities)                                              | 25                      | 10        | 6           | 5          |               | 1         | 5                  |
| Mortality                                                                                            | 18                      | 3         | 2           | 2          | 1             | 4         | 8                  |
| Birth outcomes (birth defects, pre-term birth, etc.)                                                 | 14                      | 8         | 2           | 2          | 1             |           | 2                  |
| Cancer                                                                                               | 33                      | 10        | 2           | 11         | 1             | 4         | 8                  |
| Other chronic diseases (CVD, diabetes, asthma, respiratory conditions, etc.)                         | 31                      | 11        | 7           | 1          | 4             | 2         | 7                  |
| Infectious disease                                                                                   | 21                      | 3         | 2           | 8          | 6             | 2         | 6                  |
| Behavioral (physical activity, diet, obesity, drug use)                                              | 17                      | 7         | 10          |            |               |           | 1                  |
| Neurological issues and mental health (Parkinson's, depression, etc.)                                | 13                      | 4         | 3           | 5          |               |           | 3                  |
| Resource related (health clinic access, food or physical activity environments, optimizing location) | 40                      | 17        | 20          | 1          | 2             |           | 4                  |
| Air quality and climate                                                                              | 46                      | 21        | 12          | 1          | 4             |           | 11                 |
| Other physical environment studies (toxic waste/landfill, electromagnetic fields, etc.)              | 22                      | 13        | 2           |            | 1             |           | 7                  |

\* Each article can be represented more than once. Cells are not mutually exclusive, thus, the sum of cells does not equal the marginal totals and the sum of the marginal totals does not equal the number of unique articles (n=195). For example, a disparity article can involve 1 or more methods and an article that uses spatial proximity measures could involve 1 or more substantive categories.

**Supplement Table 2.** List of articles selected for inclusion, articles published in seven target journals January 2000 through February 28, 2011.

**A. Citations that discuss georeferencing, n=14**

1. Boone JE, Gordon-Larsen P, Stewart JD, Popkin BM. 2008. Validation of a GIS facilities database: quantification and implications of error. *Ann Epidemiol* 18:371-7
2. Bonner MR, Han D, Nie J, Rogerson P, Vena JE, Freudenheim JL. 2003. Positional accuracy of geocoded addresses in epidemiologic research. *Epidemiology* 14:408-12
3. Hampton KH, Fitch MK, Allshouse WB, Doherty IA, Gesink DC, et al. 2010. Review - Mapping health data: improved privacy protection with donut method geomasking. *Am J Epidemiol* 172:1062-9
4. Hurley SE, Saunders TM, Nivas R, Hertz A, Reynolds P. 2003. Post office box addresses: A challenge for geographic information system-based studies. *Epidemiology* 14:386-91
5. Krieger N, Chen JT, Waterman PD, Soobader MJ, Subramanian SV, Carson R. 2003. Choosing area based socioeconomic measures to monitor social inequalities in low birth weight and childhood lead poisoning: The Public Health Disparities Geocoding Project (US). *J Epidemiol Community Health* 57:186-99
6. Liese AD, Colabianchi N, Lamichhane AP, Barnes TL, Hibbert JD, et al. 2010. Validation of 3 Food Outlet Databases: Completeness and Geospatial Accuracy in Rural and Urban Food Environments. *Am J Epidemiol* 172:1324-33
7. McElroy JA, Remington PL, Trentham-Dietz A, Robert SA, Newcomb PA. 2003. Geocoding addresses from a large population-based study: lessons learned. *Epidemiology* 14:399-407
8. Ong P, Graham M, Houston D. 2006. Policy and programmatic importance of spatial alignment of data sources. *Am J Public Health* 96:499-504
9. Schootman M, Jeffe D, Kinman E, Higgs G, Jackson-Thompson J. 2005. Evaluating the utility and accuracy of a reverse telephone directory to identify the location of survey respondents. *Ann Epidemiol* 15:160-6
10. Schootman M, Sterling DA, Struthers J, Yan Y, Laboube T, et al. 2007. Positional accuracy and geographic bias of four methods of geocoding in epidemiologic research. *Ann Epidemiol* 17:464-70
11. Voigt LF, Davis S, Koepsell TD. 2006. Do cases and controls matched on the first eight digits of their telephone number share geographic proximity and socioeconomic characteristics? *Ann Epidemiol* 16:299-304
12. Ward MH, Nuckols JR, Giglierano J, Bonner MR, Wolter C, et al. 2005. Positional accuracy of two methods of geocoding. *Epidemiology* 16:542-7
13. Whitsel EA, Rose KM, Wood JL, Henley AC, Liao DP, Heiss G. 2004. Accuracy and repeatability of commercial geocoding. *Am J Epidemiol* 160:1023-9
14. Zhan FB, Brender JD, De Lima I, Suarez L, Langlois PH. 2006. Match rate and positional accuracy of two geocoding methods for epidemiologic research. *Ann Epidemiol* 16:842-9

**B. Citations using spatial methods that are not part of the georeferencing section, n=193**

1. Allen RW, Criqui MH, Diez Roux AV, Allison M, Shea S, et al. 2009. Fine particulate matter air pollution, proximity to traffic, and aortic atherosclerosis. *Epidemiology* 20:254-64
2. Anderson BG, Bell ML. 2009. Weather-related mortality: how heat, cold, and heat waves affect mortality in the United States. *Epidemiology* 20:205-13
3. Auchincloss AH, Diez Roux AV, Brown DG, O'Meara ES, Raghunathan TE. 2007. Association of insulin resistance with distance to wealthy areas: the multi-ethnic study of atherosclerosis. *Am J Epidemiol* 165:389-97
4. Auchincloss AH, Diez Roux AV, Brown DG, Raghunathan TE, Erdmann CA. 2007. Filling the gaps: spatial interpolation of residential survey data in the estimation of neighborhood characteristics. *Epidemiology* 18:469-78
5. Austin SB, Melly SJ, Sanchez BN, Patel A, Buka S, Gortmaker SL. 2005. Clustering of fast-food restaurants around schools: a novel application of spatial statistics to the study of food environments. *Am J Public Health* 95:1575-81
6. Babisch W, Beule B, Schust M, Kersten N, Ising H. 2005. Traffic noise and risk of myocardial infarction. *Epidemiology* 16:33-40

7. Bader MD, Ailshire JA, Morenoff JD, House JS. 2010. Measurement of the local food environment: a comparison of existing data sources. *Am J Epidemiol* 171:609-17
8. Ball K, Timperio A, Salmon J, Giles-Corti B, Roberts R, Crawford D. 2007. Personal, social and environmental determinants of educational inequalities in walking: a multilevel study. *J Epidemiol Community Health* 61:108-14
9. Bates SJ, Trostle J, Cevallos WT, Hubbard A, Eisenberg JN. 2007. Relating diarrheal disease to social networks and the geographic configuration of communities in rural Ecuador. *Am J Epidemiol* 166:1088-95
10. Bayer-Oglesby L, Schindler C, Hazenkamp-von Arx ME, Braun-Fahrlander C, Keidel D, et al. 2006. Living near main streets and respiratory symptoms in adults: the Swiss Cohort Study on Air Pollution and Lung Diseases in Adults. *Am J Epidemiol* 164:1190-8
11. Beelen R, Hoek G, van den Brandt PA, Goldbohm RA, Fischer P, et al. 2008. Long-term exposure to traffic-related air pollution and lung cancer risk. *Epidemiology* 19:702-10
12. Bell EM, Hertz-Picciotto I, Beaumont JJ. 2001. Case-cohort analysis of agricultural pesticide applications near maternal residence and selected causes of fetal death. *Am J Epidemiol* 154:702-10
13. Bell EM, Hertz-Picciotto I, Beaumont JJ. 2001. A case-control study of pesticides and fetal death due to congenital anomalies. *Epidemiology* 12:148-56
14. Berke EM, Tanski SE, Demidenko E, Alford-Teaster J, Shi X, Sargent JD. 2010. Alcohol retail density and demographic predictors of health disparities: a geographic analysis. *Am J Public Health* 100:1967-71
15. Bernstein KT, Curriero FC, Jennings JM, Olthoff G, Erbeling EJ, Zenilman J. 2004. Defining core gonorrhea transmission utilizing spatial data. *Am J Epidemiol* 160:51-8
16. Best N, Hansell AL. 2009. Geographic variations in risk: adjusting for unmeasured confounders through joint modeling of multiple diseases. *Epidemiology* 20:400-10
17. Blaasaas KG, Tynes T, Lie RT. 2003. Residence near power lines and the risk of birth defects. *Epidemiology* 14:95-8
18. Boyd HA, Flanders WD, Addiss DG, Waller LA. 2005. Residual spatial correlation between geographically referenced observations: a Bayesian hierarchical modeling approach. *Epidemiology* 16:532-41
19. Brauer M, Hoek G, van Vliet P, Meliefste K, Fischer P, et al. 2003. Estimating long-term average particulate air pollution concentrations: application of traffic indicators and geographic information systems. *Epidemiology* 14:228-39
20. Buonocore JJ, Lee HJ, Levy JI. 2009. The influence of traffic on air quality in an urban neighborhood: a community-university partnership. *Am J Public Health* 99 Suppl 3:S629-35
21. Cervero R, Duncan M. 2003. Walking, bicycling, and urban landscapes: evidence from the San Francisco Bay Area. *Am J Public Health* 93:1478-83
22. Chaix B, Leyland AH, Sabel CE, Chauvin P, Rastam L, et al. 2006. Spatial clustering of mental disorders and associated characteristics of the neighbourhood context in Malmo, Sweden, in 2001. *J Epidemiol Community Health* 60:427-35
23. Chaix B, Merlo J, Chauvin P. 2005. Comparison of a spatial approach with the multilevel approach for investigating place effects on health: the example of healthcare utilisation in France. *J Epidemiol Community Health* 59:517-26
24. Chaix B, Merlo J, Subramanian SV, Lynch J, Chauvin P. 2005. Comparison of a spatial perspective with the multilevel analytical approach in neighborhood studies: the case of mental and behavioral disorders due to psychoactive substance use in Malmo, Sweden, 2001. *Am J Epidemiol* 162:171-82
25. Chakraborty J, Zandbergen PA. 2007. Children at risk: measuring racial/ethnic disparities in potential exposure to air pollution at school and home. *J Epidemiol Community Health* 61:1074-9
26. Che D, Decludt B, Campese C, Desenclos JC. 2003. Sporadic cases of community acquired legionnaires' disease: an ecological study to identify new sources of contamination. *J Epidemiol Community Health* 57:466-9
27. Cheng AC, Jacups SP, Gal D, Mayo M, Currie BJ. 2006. Extreme weather events and environmental contamination are associated with case-clusters of melioidosis in the Northern Territory of Australia. *Int J Epidemiol* 35:323-9
28. Cliff AD, Haggett P, Smallman-Raynor M. 2008. An exploratory method for estimating the changing speed of epidemic waves from historical data. *Int J Epidemiol* 37:106-12
29. Cohen D, Spear S, Scribner R, Kissinger P, Mason K, Wildgen J. 2000. "Broken windows" and the risk of gonorrhea. *Am J Public Health* 90:230-6
30. Colonna M. 2004. Bootstrap investigation of the stability of disease mapping of Bayesian cancer relative risk estimations. *Eur J Epidemiol* 19:761-8

31. Cooper HL, Des Jarlais DC, Ross Z, Tempalski B, Bossak B, Friedman SR. 2010. Spatial Access to Syringe Exchange Programs and Pharmacies Selling Over-the-Counter Syringes as Predictors of Drug Injectors' Use of Sterile Syringes. *Am J Public Health*
32. Dadvand P, Rankin J, Rushton S, Pless-Mulloli T. 2011. Association between maternal exposure to ambient air pollution and congenital heart disease: A register-based spatiotemporal analysis. *Am J Epidemiol* 173:171-82
33. D'Aignaux JH, Cousens SN, Delasnerie-Laupretre N, Brandel JP, Salomon D, et al. 2002. Analysis of the geographical distribution of sporadic Creutzfeldt-Jakob disease in France between 1992 and 1998. *Int J Epidemiol* 31:490-5
34. Darrow LA, Klein M, Flanders WD, Waller LA, Correa A, et al. 2009. Ambient air pollution and preterm birth: a time-series analysis. *Epidemiology* 20:689-98
35. Davis B, Carpenter C. 2009. Proximity of fast-food restaurants to schools and adolescent obesity. *Am J Public Health* 99:505-10
36. Diez Roux AV, Evenson KR, McGinn AP, Brown DG, Moore L, et al. 2007. Availability of recreational resources and physical activity in adults. *Am J Public Health* 97:493-9
37. Ditsuwan T, Liabsuetrakul T, Chongsuvivatwong V, Thammapalo S, McNeil E. 2011. Assessing the spreading patterns of dengue infection and chikungunya Fever outbreaks in lower southern Thailand using a geographic information system. *Ann Epidemiol* 21:253-61
38. Dominguez-Berjon MF, Gandarillas A, Segura del Pozo J, Zorrilla B, Soto MJ, et al. 2010. Census tract socioeconomic and physical environment and cardiovascular mortality in the Region of Madrid (Spain). *J Epidemiol Community Health* 64:1086-93
39. Doocy S, Gorokhovich Y, Burnham G, Balk D, Robinson C. 2007. Tsunami mortality estimates and vulnerability mapping in Aceh, Indonesia. *Am J Public Health* 97 Suppl 1:S146-51
40. Dummer TJ, Dickinson HO, Parker L. 2003. Adverse pregnancy outcomes around incinerators and crematoriums in Cumbria, north west England, 1956-93. *J Epidemiol Community Health* 57:456-61
41. Edwards KL, Clarke GP, Ransley JK, Cade J. 2010. The neighbourhood matters: studying exposures relevant to childhood obesity and the policy implications in Leeds, UK. *J Epidemiol Community Health* 64:194-201
42. Emch M, Ali M, Park JK, Yunus M, Sack DA, Clemens JD. 2006. Relationship between neighbourhood-level killed oral cholera vaccine coverage and protective efficacy: evidence for herd immunity. *Int J Epidemiol* 35:1044-50
43. Feltbower RG, Manda SO, Gilthorpe MS, Greaves MF, Parslow RC, et al. 2005. Detecting small-area similarities in the epidemiology of childhood acute lymphoblastic leukemia and diabetes mellitus, type 1: a Bayesian approach. *Am J Epidemiol* 161:1168-80
44. Floret N, Mauny F, Challier B, Arveux P, Cahn JY, Viel JF. 2003. Dioxin emissions from a solid waste incinerator and risk of non-Hodgkin lymphoma. *Epidemiology* 14:392-8
45. Gan WQ, Tamburic L, Davies HW, Demers PA, Koehoorn M, Brauer M. 2010. Changes in residential proximity to road traffic and the risk of death from coronary heart disease. *Epidemiology* 21:642-9
46. Garshick E, Laden F, Hart JE, Caron A. 2003. Residence near a major road and respiratory symptoms in U.S. Veterans. *Epidemiology* 14:728-36
47. Gauderman WJ, Avol E, Lurmann F, Kuenzli N, Gilliland F, et al. 2005. Childhood asthma and exposure to traffic and nitrogen dioxide. *Epidemiology* 16:737-43
48. Gehring U, Heinrich J, Kramer U, Grote V, Hochadel M, et al. 2006. Long-term exposure to ambient air pollution and cardiopulmonary mortality in women. *Epidemiology* 17:545-51
49. Gemperli A, Vounatsou P, Kleinschmidt I, Bagayoko M, Lengeler C, Smith T. 2004. Spatial patterns of infant mortality in Mali: the effect of malaria endemicity. *Am J Epidemiol* 159:64-72
50. Gemperli A, Vounatsou P, Sogoba N, Smith T. 2006. Malaria mapping using transmission models: application to survey data from Mali. *Am J Epidemiol* 163:289-97
51. Genereux M, Auger N, Goneau M, Daniel M. 2008. Neighbourhood socioeconomic status, maternal education and adverse birth outcomes among mothers living near highways. *J Epidemiol Community Health* 62:695-700
52. Gesink Law DC, Bernstein KT, Serre ML, Schumacher CM, Leone PA, et al. 2006. Modeling a syphilis outbreak through space and time using the Bayesian maximum entropy approach. *Ann Epidemiol* 16:797-804
53. Ghirardelli A, Quinn V, Foerster SB. 2010. Using geographic information systems and local food store data in California's low-income neighborhoods to inform community initiatives and resources. *Am J Public Health* 100:2156-62
54. Greene SK, Ionides EL, Wilson ML. 2006. Patterns of influenza-associated mortality among US elderly by geographic region and virus subtype, 1968-1998. *Am J Epidemiol* 163:316-26

55. Gregorio DI, Huang L, DeChello LM, Samociuk H, Kulldorff M. 2007. Place of residence effect on likelihood of surviving prostate cancer. *Ann Epidemiol* 17:520-4
56. Gregorio DI, Samociuk H. 2003. Breast cancer surveillance using gridded population units, Connecticut, 1992 to 1995. *Ann Epidemiol* 13:42-9
57. Gustafsson B, Carstensen J. 2000. Space-time clustering of childhood lymphatic leukaemias and non-Hodgkin's lymphomas in Sweden. *Eur J Epidemiol* 16:1111-6
58. Gutierrez E, Taucer F, De Groeve T, Al-Khudhairy DH, Zaldivar JM. 2005. Analysis of worldwide earthquake mortality using multivariate demographic and seismic data. *Am J Epidemiol* 161:1151-8
59. Hasin DS, Keyes KM, Hatzenbuehler ML, Aharonovich EA, Alderson D. 2007. Alcohol consumption and posttraumatic stress after exposure to terrorism: effects of proximity, loss, and psychiatric history. *Am J Public Health* 97:2268-75
60. Havard S, Deguen S, Zmirou-Navier D, Schillinger C, Bard D. 2009. Traffic-related air pollution and socioeconomic status: a spatial autocorrelation study to assess environmental equity on a small-area scale. *Epidemiology* 20:223-30
61. Havulinna AS, Paakkonen R, Karvonen M, Salomaa V. 2008. Geographic patterns of incidence of ischemic stroke and acute myocardial infarction in Finland during 1991-2003. *Ann Epidemiol* 18:206-13
62. Hickson DA, Waller LA, Gebreab SY, Wyatt SB, Kelly J, et al. 2011. Geographic representation of the Jackson heart study cohort to the African-American population in Jackson, Mississippi. *Am J Epidemiol* 173:110-7
63. Hodgson S, Nieuwenhuijsen MJ, Elliott P, Jarup L. 2007. Kidney disease mortality and environmental exposure to mercury. *Am J Epidemiol* 165:72-7
64. Hoffmann B, Moebus S, Kroger K, Stang A, Mohlenkamp S, et al. 2009. Residential exposure to urban air pollution, ankle-brachial index, and peripheral arterial disease. *Epidemiology* 20:280-8
65. Houben MP, Coebergh JW, Birch JM, Tijssen CC, van Duijn CM, McNally RJ. 2006. Space-time clustering of glioma cannot be attributed to specific histological subgroups. *Eur J Epidemiol* 21:197-201
66. Houston D, Ong P, Wu J, Winer A. 2006. Proximity of licensed child care facilities to near-roadway vehicle pollution. *Am J Public Health* 96:1611-7
67. Hu W, Mengersen K, Tong S. 2009. Spatial analysis of notified cryptosporidiosis infections in Brisbane, Australia. *Ann Epidemiol* 19:900-7
68. Huang L, Pickle LW, Stinchcomb D, Feuer EJ. 2007. Detection of spatial clusters: application to cancer survival as a continuous outcome. *Epidemiology* 18:73-87
69. Huss A, Spoerri A, Egger M, Roosli M. 2009. Residence near power lines and mortality from neurodegenerative diseases: longitudinal study of the Swiss population. *Am J Epidemiol* 169:167-75
70. Huss A, Spoerri A, Egger M, Roosli M. 2010. Aircraft noise, air pollution, and mortality from myocardial infarction. *Epidemiology* 21:829-36
71. Jackson LE, Hilborn ED, Thomas JC. 2006. Towards landscape design guidelines for reducing Lyme disease risk. *Int J Epidemiol* 35:315-22
72. James L, Matthews I, Nix B. 2004. Spatial contouring of risk: a tool for environmental epidemiology. *Epidemiology* 15:287-92
73. Jennings JM, Curriero FC, Celentano D, Ellen JM. 2005. Geographic identification of high gonorrhea transmission areas in Baltimore, Maryland. *Am J Epidemiol* 161:73-80
74. Jerrett M, Burnett RT, Ma R, Pope CA, 3rd, Krewski D, et al. 2005. Spatial analysis of air pollution and mortality in Los Angeles. *Epidemiology* 16:727-36
75. Johnson GD, Eidson M, Schmit K, Ellis A, Kulldorff M. 2006. Geographic prediction of human onset of West Nile virus using dead crow clusters: an evaluation of year 2002 data in New York State. *Am J Epidemiol* 163:171-80
76. Johnson KC, Pan S, Fry R, Mao Y. 2003. Residential proximity to industrial plants and non-Hodgkin lymphoma. *Epidemiology* 14:687-93
77. Kaczynski AT, Potwarka LR, Saelens BE. 2008. Association of park size, distance, and features with physical activity in neighborhood parks. *Am J Public Health* 98:1451-6
78. Kalkbrenner AE, Daniels JL, Chen JC, Poole C, Ernich M, Morrissey J. 2010. Perinatal exposure to hazardous air pollutants and autism spectrum disorders at age 8. *Epidemiology* 21:631-41
79. Kamphuis CB, Giskes K, Kavanagh AM, Thornton LE, Thomas LR, et al. 2008. Area variation in recreational cycling in Melbourne: a compositional or contextual effect? *J Epidemiol Community Health* 62:890-8
80. Karakatsani A, Andreadaki S, Katsouyanni K, Dimitroulis I, Trichopoulos D, et al. 2003. Air pollution in relation to manifestations of chronic pulmonary disease: a nested case-control study in Athens, Greece. *Eur J Epidemiol* 18:45-53

81. Kazembe LN, Namangale JJ. 2007. A Bayesian multinomial model to analyse spatial patterns of childhood co-morbidity in Malawi. *Eur J Epidemiol* 22:545-56
82. Kleinerman RA, Kaune WT, Hatch EE, Wacholder S, Linet MS, et al. 2000. Are children living near high-voltage power lines at increased risk of acute lymphoblastic leukemia? *Am J Epidemiol* 151:512-5
83. Kleinschmidt I, Bagayoko M, Clarke GP, Craig M, Le Sueur D. 2000. A spatial statistical approach to malaria mapping. *Int J Epidemiol* 29:355-61
84. Kleinschmidt I, Sharp B, Mueller I, Vounatsou P. 2002. Rise in malaria incidence rates in South Africa: a small-area spatial analysis of variation in time trends. *Am J Epidemiol* 155:257-64
85. Kleinschmidt I, Sharp BL, Clarke GP, Curtis B, Fraser C. 2001. Use of generalized linear mixed models in the spatial analysis of small-area malaria incidence rates in Kwazulu Natal, South Africa. *Am J Epidemiol* 153:1213-21
86. Knox E. 2000. Childhood cancers, birthplaces, incinerators and landfill sites. *Int J Epidemiol* 29:391-7
87. Knox EG. 2005. Childhood cancers and atmospheric carcinogens. *J Epidemiol Community Health* 59:101-5
88. Knox EG. 2005. Oil combustion and childhood cancers. *J Epidemiol Community Health* 59:755-60
89. Knox EG. 2006. Roads, railways, and childhood cancers. *J Epidemiol Community Health* 60:136-41
90. Kohli S, Noorlind Brage H, Lofman O. 2000. Childhood leukaemia in areas with different radon levels: a spatial and temporal analysis using GIS. *J Epidemiol Community Health* 54:822-6
91. Kousa A, Moltchanova E, Viik-Kajander M, Rytkonen M, Tuomilehto J, et al. 2004. Geochemistry of ground water and the incidence of acute myocardial infarction in Finland. *J Epidemiol Community Health* 58:136-9
92. Kramer U, Koch T, Ranft U, Ring J, Behrendt H. 2000. Traffic-related air pollution is associated with atopy in children living in urban areas. *Epidemiology* 11:64-70
93. Kwate NO, Meyer IH. 2009. Association between residential exposure to outdoor alcohol advertising and problem drinking among African American women in New York City. *Am J Public Health* 99:228-30
94. Langholz B, Ebi KL, Thomas DC, Peters JM, London SJ. 2002. Traffic density and the risk of childhood leukemia in a Los Angeles case-control study. *Ann Epidemiol* 12:482-7
95. Larsen K, Gilliland J, Hess P, Tucker P, Irwin J, He M. 2009. The influence of the physical environment and sociodemographic characteristics on children's mode of travel to and from school. *Am J Public Health* 99:520-6
96. Laurent O, Filleul L, Havard S, Deguen S, Declercq C, Bard D. 2008. Asthma attacks and deprivation: gradients in use of mobile emergency medical services. *J Epidemiol Community Health* 62:1014-6
97. Lewis SA, Antoniak M, Venn AJ, Davies L, Goodwin A, et al. 2005. Secondhand smoke, dietary fruit intake, road traffic exposures, and the prevalence of asthma: a cross-sectional study in young children. *Am J Epidemiol* 161:406-11
98. Li F, Fisher KJ, Brownson RC, Bosworth M. 2005. Multilevel modelling of built environment characteristics related to neighbourhood walking activity in older adults. *J Epidemiol Community Health* 59:558-64
99. Li F, Harmer P, Cardinal BJ, Bosworth M, Johnson-Shelton D, et al. 2009. Built environment and 1-year change in weight and waist circumference in middle-aged and older adults: Portland Neighborhood Environment and Health Study. *Am J Epidemiol* 169:401-8
100. Lovasi GS, Neckerman KM, Quinn JW, Weiss CC, Rundle A. 2009. Effect of individual or neighborhood disadvantage on the association between neighborhood walkability and body mass index. *Am J Public Health* 99:279-84
101. Lovasi GS, Quinn JW, Rauh VA, Perera FP, Andrews HF, et al. 2011. Chlorpyrifos exposure and urban residential environment characteristics as determinants of early childhood neurodevelopment. *Am J Public Health* 101:63-70
102. Loyo-Berrios NI, Irizarry R, Hennessey JG, Tao XG, Matanoski G. 2007. Air pollution sources and childhood asthma attacks in Catano, Puerto Rico. *Am J Epidemiol* 165:927-35
103. Maas J, Verheij RA, Groenewegen PP, de Vries S, Spreeuwenberg P. 2006. Green space, urbanity, and health: how strong is the relation? *J Epidemiol Community Health* 60:587-92
104. Maheswaran R, Pearson T, Jordan H, Black D. 2006. Socioeconomic deprivation, travel distance, location of service, and uptake of breast cancer screening in North Derbyshire, UK. *J Epidemiol Community Health* 60:208-12
105. Maheswaran R, Strachan DP, Dodgeon B, Best NG. 2002. A population-based case-control study for examining early life influences on geographical variation in adult mortality in England and Wales using stomach cancer and stroke as examples. *Int J Epidemiol* 31:375-82
106. Manda SO, Feltbower RG, Gilthorpe MS. 2009. Investigating spatio-temporal similarities in the epidemiology of childhood leukaemia and diabetes. *Eur J Epidemiol* 24:743-52

107. Martins MC, Fatigati FL, Vespoli TC, Martins LC, Pereira LA, et al. 2004. Influence of socioeconomic conditions on air pollution adverse health effects in elderly people: an analysis of six regions in Sao Paulo, Brazil. *J Epidemiol Community Health* 58:41-6
108. Mason SM, Kaufman JS, Emch ME, Hogan VK, Savitz DA. 2010. Ethnic density and preterm birth in African-, Caribbean-, and US-born non-Hispanic black populations in New York City. *Am J Epidemiol* 172:800-8
109. McLafferty S, Grady S. 2005. Immigration and geographic access to prenatal clinics in Brooklyn, NY: a geographic information systems analysis. *Am J Public Health* 95:638-40
110. McNally RJ, Colver AF. 2008. Space-time clustering analyses of occurrence of cerebral palsy in Northern England for births 1991 to 2003. *Ann Epidemiol* 18:108-12
111. McNally RJ, Pearce MS, Parker L. 2006. Space-time clustering analyses of testicular cancer amongst 15-24-year-olds in Northern England. *Eur J Epidemiol* 21:139-44
112. McNally RJ, Rankin J, Shirley MD, Rushton SP, Pless-Mulloli T. 2008. Space-time analysis of Down syndrome: results consistent with transient pre-disposing contagious agent. *Int J Epidemiol* 37:1169-79
113. Michael YL, Perdue LA, Orwoll ES, Stefanick ML, Marshall LM. 2010. Physical activity resources and changes in walking in a cohort of older men. *Am J Public Health* 100:654-60
114. Michelozzi P, Capon A, Kirchmayer U, Forastiere F, Biggeri A, et al. 2002. Adult and childhood leukemia near a high-power radio station in Rome, Italy. *Am J Epidemiol* 155:1096-103
115. Middleton N, Sterne JA, Gunnell D. 2006. The geography of despair among 15-44-year-old men in England and Wales: putting suicide on the map. *J Epidemiol Community Health* 60:1040-7
116. Miyake Y, Yura A, Misaki H, Ikeda Y, Usui T, et al. 2005. Relationship between distance of schools from the nearest municipal waste incineration plant and child health in Japan. *Eur J Epidemiol* 20:1023-9
117. Mohai P, Lantz PM, Morenoff J, House JS, Mero RP. 2009. Racial and socioeconomic disparities in residential proximity to polluting industrial facilities: evidence from the Americans' Changing Lives Study. *Am J Public Health* 99 Suppl 3:S649-56
118. Moore LV, Diez Roux AV, Nettleton JA, Jacobs DR, Jr. 2008. Associations of the local food environment with diet quality--a comparison of assessments based on surveys and geographic information systems: the multi-ethnic study of atherosclerosis. *Am J Epidemiol* 167:917-24
119. Moore LV, Diez Roux AV, Nettleton JA, Jacobs DR, Franco M. 2009. Fast-food consumption, diet quality, and neighborhood exposure to fast food: the multi-ethnic study of atherosclerosis. *Am J Epidemiol* 170:29-36
120. Morabia A, Mirer FE, Amstislavski TM, Eisl HM, Werbe-Fuentes J, et al. 2010. Potential health impact of switching from car to public transportation when commuting to work. *Am J Public Health* 100:2388-91
121. Morris SE, Sale RC, Wakefield JC, Falconer S, Elliott P, Boucher BJ. 2000. Hospital admissions for asthma and chronic obstructive airways disease in east London hospitals and proximity of residence to main roads. *J Epidemiol Community Health* 54:75-6
122. Mortimer K, Neugebauer R, Lurmann F, Alcorn S, Balmes J, Tager I. 2008. Air pollution and pulmonary function in asthmatic children: effects of prenatal and lifetime exposures. *Epidemiology* 19:550-7; discussion 61-2
123. Mujahid MS, Diez Roux AV, Morenoff JD, Raghunathan T. 2007. Assessing the measurement properties of neighborhood scales: from psychometrics to econometrics. *Am J Epidemiol* 165:858-67
124. Mujahid MS, Diez Roux AV, Morenoff JD, Raghunathan TE, Cooper RS, et al. 2008. Neighborhood characteristics and hypertension. *Epidemiology* 19:590-8
125. Naess O, Nafstad P, Aamodt G, Claussen B, Rosland P. 2007. Relation between concentration of air pollution and cause-specific mortality: four-year exposures to nitrogen dioxide and particulate matter pollutants in 470 neighborhoods in Oslo, Norway. *Am J Epidemiol* 165:435-43
126. Nagel CL, Carlson NE, Bosworth M, Michael YL. 2008. The relation between neighborhood built environment and walking activity among older adults. *Am J Epidemiol* 168:461-8
127. Nordling E, Berglind N, Melen E, Emenius G, Hallberg J, et al. 2008. Traffic-related air pollution and childhood respiratory symptoms, function and allergies. *Epidemiology* 19:401-8
128. Nyberg F, Gustavsson P, Jarup L, Bellander T, Berglind N, et al. 2000. Urban air pollution and lung cancer in Stockholm. *Epidemiology* 11:487-95
129. Olson KL, Grannis SJ, Mandl KD. 2006. Privacy protection versus cluster detection in spatial epidemiology. *Am J Public Health* 96:2002-8
130. Omer SB, Enger KS, Moulton LH, Halsey NA, Stokley S, Salmon DA. 2008. Geographic clustering of nonmedical exemptions to school immunization requirements and associations with geographic clustering of pertussis. *Am J Epidemiol* 168:1389-96
131. Onozuka D, Hagihara A. 2008. Spatial and temporal dynamics of influenza outbreaks. *Epidemiology* 19:824-8

132. Ostro B, Rauch S, Green R, Malig B, Basu R. 2010. The effects of temperature and use of air conditioning on hospitalizations. *Am J Epidemiol* 172:1053-61
133. Oyana TJ, Rogerson P, Lwebuga-Mukasa JS. 2004. Geographic clustering of adult asthma hospitalization and residential exposure to pollution at a United States-Canada border crossing. *Am J Public Health* 94:1250-7
134. Pearce J, Hiscock R, Blakely T, Witten K. 2008. The contextual effects of neighbourhood access to supermarkets and convenience stores on individual fruit and vegetable consumption. *J Epidemiol Community Health* 62:198-201
135. Pearce J, Hiscock R, Moon G, Barnett R. 2009. The neighbourhood effects of geographical access to tobacco retailers on individual smoking behaviour. *J Epidemiol Community Health* 63:69-77
136. Pearce J, Mason K, Hiscock R, Day P. 2008. A national study of neighbourhood access to gambling opportunities and individual gambling behaviour. *J Epidemiol Community Health* 62:862-8
137. Pearce J, Witten K, Bartie P. 2006. Neighbourhoods and health: a GIS approach to measuring community resource accessibility. *J Epidemiol Community Health* 60:389-95
138. Pearce J, Witten K, Hiscock R, Blakely T. 2007. Are socially disadvantaged neighbourhoods deprived of health-related community resources? *Int J Epidemiol* 36:348-55
139. Pedigo AS, Odoi A. 2010. Investigation of disparities in geographic accessibility to emergency stroke and myocardial infarction care in East Tennessee using geographic information systems and network analysis. *Ann Epidemiol* 20:924-30
140. Peek-Asa C, Ramirez MR, Shoaf K, Seligson H, Kraus JF. 2000. GIS mapping of earthquake-related deaths and hospital admissions from the 1994 Northridge, California, Earthquake. *Ann Epidemiol* 10:5-13
141. Pesch B, Ranft U, Jakubis P, Nieuwenhuijsen MJ, Hergemoller A, et al. 2002. Environmental arsenic exposure from a coal-burning power plant as a potential risk factor for nonmelanoma skin carcinoma: results from a case-control study in the district of Prievidza, Slovakia. *Am J Epidemiol* 155:798-809
142. Pikhart H, Bobak M, Kriz B, Danova J, Celko MA, et al. 2000. Outdoor air concentrations of nitrogen dioxide and sulfur dioxide and prevalence of wheezing in school children. *Epidemiology* 11:153-60
143. Polgreen PM, Chen Z, Segre AM, Harris ML, Pentella MA, Rushton G. 2009. Optimizing influenza sentinel surveillance at the state level. *Am J Epidemiol* 170:1300-6
144. Ponce NA, Hoggatt KJ, Wilhelm M, Ritz B. 2005. Preterm birth: the interaction of traffic-related air pollution with economic hardship in Los Angeles neighborhoods. *Am J Epidemiol* 162:140-8
145. Pugliatti M, Riise T, Sotgiu MA, Satta WM, Sotgiu S, et al. 2006. Evidence of early childhood as the susceptibility period in multiple sclerosis: space-time cluster analysis in a Sardinian population. *Am J Epidemiol* 164:326-33
146. Radon K, Schulze A, Ehrenstein V, van Strien RT, Praml G, Nowak D. 2007. Environmental exposure to confined animal feeding operations and respiratory health of neighboring residents. *Epidemiology* 18:300-8
147. Ramis Prieto R, Garcia-Perez J, Pollan M, Aragones N, Perez-Gomez B, Lopez-Abente G. 2007. Modelling of municipal mortality due to haematological neoplasias in Spain. *J Epidemiol Community Health* 61:165-71
148. Reynolds P, Von Behren J, Gunier RB, Goldberg DE, Hertz A. 2004. Residential exposure to traffic in California and childhood cancer. *Epidemiology* 15:6-12
149. Rogers JF, Thompson SJ, Addy CL, McKeown RE, Cowen DJ, Decoufle P. 2000. Association of very low birth weight with exposures to environmental sulfur dioxide and total suspended particulates. *Am J Epidemiol* 151:602-13
150. Rondeau V, Jacqmin-Gadda H, Commenges D, Helmer C, Dartigues JF. 2009. Aluminum and silica in drinking water and the risk of Alzheimer's disease or cognitive decline: findings from 15-year follow-up of the PAQUID cohort. *Am J Epidemiol* 169:489-96
151. Rosenlund M, Berglund N, Pershagen G, Hallqvist J, Jonson T, Bellander T. 2006. Long-term exposure to urban air pollution and myocardial infarction. *Epidemiology* 17:383-90
152. Rull RP, Ritz B, Shaw GM. 2006. Neural tube defects and maternal residential proximity to agricultural pesticide applications. *Am J Epidemiol* 163:743-53
153. Sabel CE, Boyle PJ, Loytonen M, Gatrell AC, Jokelainen M, et al. 2003. Spatial clustering of amyotrophic lateral sclerosis in Finland at place of birth and place of death. *Am J Epidemiol* 157:898-905
154. Saelens BE, Sallis JF, Black JB, Chen D. 2003. Neighborhood-based differences in physical activity: an environment scale evaluation. *Am J Public Health* 93:1552-8
155. Salah AB, Kamarianakis Y, Chlif S, Alaya NB, Prastacos P. 2007. Zoonotic cutaneous leishmaniasis in central Tunisia: spatio temporal dynamics. *Int J Epidemiol* 36:991-1000
156. Samuelsson U, Lofman O. 2004. Geographical mapping of type 1 diabetes in children and adolescents in south east Sweden. *J Epidemiol Community Health* 58:388-92



157. Sankoh OA, Ye Y, Sauerborn R, Muller O, Becher H. 2001. Clustering of childhood mortality in rural Burkina Faso. *Int J Epidemiol* 30:485-92
158. Sasaki S, Igarashi K, Fujino Y, Comber AJ, Brunson C, et al. 2010. The impact of community-based outreach immunisation services on immunisation coverage with GIS network accessibility analysis in peri-urban areas, Zambia. *J Epidemiol Community Health*
159. Schmiedel S, Blettner M, Kaatsch P, Schuz J. 2010. Spatial clustering and space-time clusters of leukemia among children in Germany, 1987-2007. *Eur J Epidemiol* 25:627-33
160. Schoeps A, Gabrysch S, Niamba L, Sie A, Becher H. 2011. The effect of distance to health-care facilities on childhood mortality in rural burkina faso. *Am J Epidemiol* 173:492-8
161. Schootman M, Jeff DB, Gillanders WE, Yan Y, Jenkins B, Aft R. 2007. Geographic clustering of adequate diagnostic follow-up after abnormal screening results for breast cancer among low-income women in Missouri. *Ann Epidemiol* 17:704-12
162. Schootman M, Jeffe DB, Lian M, Gillanders WE, Aft R. 2009. The role of poverty rate and racial distribution in the geographic clustering of breast cancer survival among older women: a geographic and multilevel analysis. *Am J Epidemiol* 169:554-61
163. Schootman M, Sun D. 2004. Small-area incidence trends in breast cancer. *Epidemiology* 15:300-7
164. Sebert Kuhlmann AK, Brett J, Thomas D, Sain SR. 2009. Environmental characteristics associated with pedestrian-motor vehicle collisions in Denver, Colorado. *Am J Public Health* 99:1632-7
165. Selvin S, Merrill DW. 2002. Adult leukemia: a spatial analysis. *Epidemiology* 13:151-6
166. Shen M, Cozen W, Huang L, Colt J, De Roos AJ, et al. 2008. Census and geographic differences between respondents and nonrespondents in a case-control study of non-Hodgkin lymphoma. *Am J Epidemiol* 167:350-61
167. Shi X, Duell E, Demidenko E, Onega T, Wilson B, Hoftiezer D. 2007. A polygon-based locally-weighted-average method for smoothing disease rates of small units. *Epidemiology* 18:523-8
168. Smargiassi A, Berrada K, Fortier I, Kosatsky T. 2006. Traffic intensity, dwelling value, and hospital admissions for respiratory disease among the elderly in Montreal (Canada): a case-control analysis. *J Epidemiol Community Health* 60:507-12
169. Smith DM, Cummins S, Taylor M, Dawson J, Marshall D, et al. 2010. Neighbourhood food environment and area deprivation: spatial accessibility to grocery stores selling fresh fruit and vegetables in urban and rural settings. *Int J Epidemiol* 39:277-84
170. Suarez L, Brender JD, Langlois PH, Zhan FB, Moody K. 2007. Maternal exposures to hazardous waste sites and industrial facilities and risk of neural tube defects in offspring. *Ann Epidemiol* 17:772-7
171. Sugiyama T, Francis J, Middleton NJ, Owen N, Giles-Corti B. 2010. Associations between recreational walking and attractiveness, size, and proximity of neighborhood open spaces. *Am J Public Health* 100:1752-7
172. Sullivan AB, Gesink DC, Brown P, Zhou L, Kaufman JS, et al. 2011. Are neighborhood sociocultural factors influencing the spatial pattern of gonorrhea in North Carolina? *Ann Epidemiol* 21:245-52
173. Tanser F. 2006. Methodology for optimising location of new primary health care facilities in rural communities: a case study in KwaZulu-Natal, South Africa. *J Epidemiol Community Health* 60:846-50
174. Tanser F, Barnighausen T, Cooke GS, Newell ML. 2009. Localized spatial clustering of HIV infections in a widely disseminated rural South African epidemic. *Int J Epidemiol* 38:1008-16
175. Tassone EC, Waller LA, Casper ML. 2009. Small-area racial disparity in stroke mortality: an application of bayesian spatial hierarchical modeling. *Epidemiology* 20:234-41
176. Theophilides CN, Ahearn SC, Grady S, Merlino M. 2003. Identifying West Nile virus risk areas: the Dynamic Continuous-Area Space-Time system. *Am J Epidemiol* 157:843-54
177. Thomas W, Birgit R, Edith S. 2008. Changing geographical distribution of diabetes mellitus type 1 incidence in Austrian children 1989--2005. *Eur J Epidemiol* 23:213-8
178. Tolbert PE, Mulholland JA, MacIntosh DL, Xu F, Daniels D, et al. 2000. Air quality and pediatric emergency room visits for asthma in Atlanta, Georgia, USA. *Am J Epidemiol* 151:798-810
179. Tran A, Gardon J, Weber S, Polidori L. 2002. Mapping disease incidence in suburban areas using remotely sensed data. *Am J Epidemiol* 156:662-8
180. Truong KD, Sturm R. 2009. Alcohol environments and disparities in exposure associated with adolescent drinking in California. *Am J Public Health* 99:264-70
181. Uccelli R, Binazzi A, Altavista P, Belli S, Comba P, et al. 2007. Geographic distribution of amyotrophic lateral sclerosis through motor neuron disease mortality data. *Eur J Epidemiol* 22:781-90
182. Ugarte MD, Goicoa T, Etxeberria J, Militino AF, Pollan M. 2010. Age-specific spatio-temporal patterns of female breast cancer mortality in Spain (1975-2005). *Ann Epidemiol* 20:906-16

183. Van Der Hoek W, Konradsen F, Amerasinghe PH, Perera D, Piyaratne MK, Amerasinghe FP. 2003. Towards a risk map of malaria for Sri Lanka: the importance of house location relative to vector breeding sites. *Int J Epidemiol* 32:280-5
184. Viel JF, Arveux P, Baverel J, Cahn JY. 2000. Soft-tissue sarcoma and non-Hodgkin's lymphoma clusters around a municipal solid waste incinerator with high dioxin emission levels. *Am J Epidemiol* 152:13-9
185. Weich S, Twigg L, Holt G, Lewis G, Jones K. 2003. Contextual risk factors for the common mental disorders in Britain: a multilevel investigation of the effects of place. *J Epidemiol Community Health* 57:616-21
186. Werneck GL, Costa CH, Walker AM, David JR, Wand M, Maguire JH. 2002. The urban spread of visceral leishmaniasis: clues from spatial analysis. *Epidemiology* 13:364-7
187. Williams CT, Metzger DS. 2010. Race and distance effects on regular syringe exchange program use and injection risks: a geobehavioral analysis. *Am J Public Health* 100:1068-74
188. Yeh YP, Chang HJ, Yang J, Chang SH, Suo J, Chen TH. 2005. Incidence of tuberculosis in mountain areas and surrounding townships: dose-response relationship by geographic analysis. *Ann Epidemiol* 15:526-32
189. Yorifuji T, Naruse H, Kashima S, Ohki S, Murakoshi T, et al. 2011. Residential proximity to major roads and preterm births. *Epidemiology* 22:74-80
190. Yu CL, Wang SF, Pan PC, Wu MT, Ho CK, et al. 2006. Residential exposure to petrochemicals and the risk of leukemia: using geographic information system tools to estimate individual-level residential exposure. *Am J Epidemiol* 164:200-7
191. Yu HL, Chiang CT, Lin SD, Chang TK. 2010. Spatiotemporal analysis and mapping of oral cancer risk in changhua county (taiwan): an application of generalized Bayesian maximum entropy method. *Ann Epidemiol* 20:99-107
192. Zenk SN, Schulz AJ, Israel BA, James SA, Bao S, Wilson ML. 2005. Neighborhood racial composition, neighborhood poverty, and the spatial accessibility of supermarkets in metropolitan Detroit. *Am J Public Health* 95:660-7
193. Zmirou D, Gauvin S, Pin I, Momas I, Sahraoui F, et al. 2004. Traffic related air pollution and incidence of childhood asthma: results of the Vesta case-control study. *J Epidemiol Community Health* 58:18-23
